# Supplementary material for: A self-monitored fluorescence DNA anti-counterfeiting system based on silica coated SYBR Green I/DNA gelatin nanoparticles
Source: Royal Society of Chemistry journal article supplement (doi:10.1039/c7tc01380a), 2017-01-01
Supplement: c7tc01380a1.pdf [file c7tc01380a1.pdf]

**A self-monitored fluorescence DNA anti-counterfeiting system based on silica coated SYBR Green I/DNA gelatin nanoparticles**

*Yongchun Liu, Chunhong Zhang, Xizhe Li, and Daocheng Wu\**

Y. Liu, C. Zhang, X. Li and Prof. D. Wu

Key Laboratory of Biomedical Information Engineering of the Ministry of Education, School of Life Science and Technology, Xi'an Jiaotong University, Xi'an 710049, PR China

E-mail: wudaocheng@mail.xjtu.edu.cn

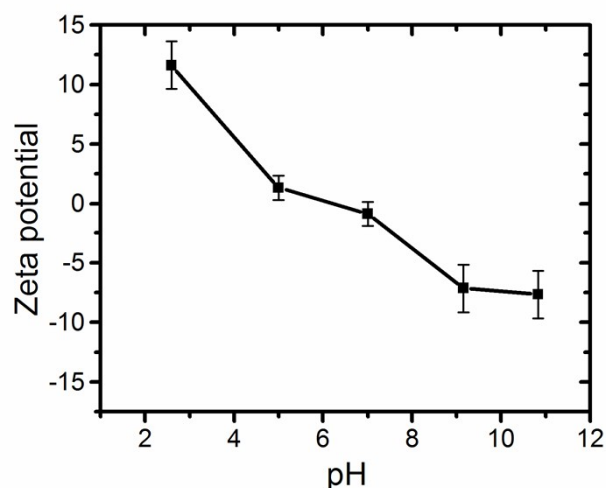

**Figure S1.** The zeta potential of the gelatin under different pH.

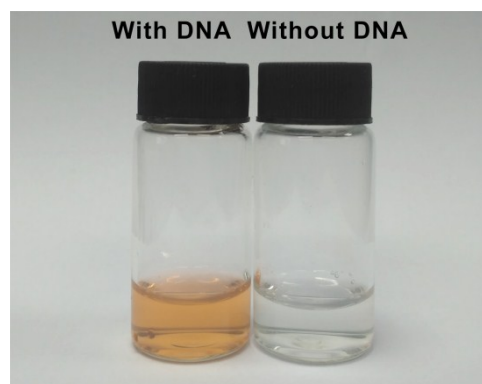

**Figure S2.** The SSDG NPs and SG loaded gelatin NPs with DNA after 72 hours dialysis in pure water.

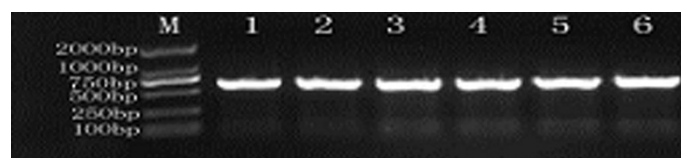

**Figure S3.** The agarose gel electrophoresis photo of the DNA fragment (720 bp) amplified from calf thymus DNA

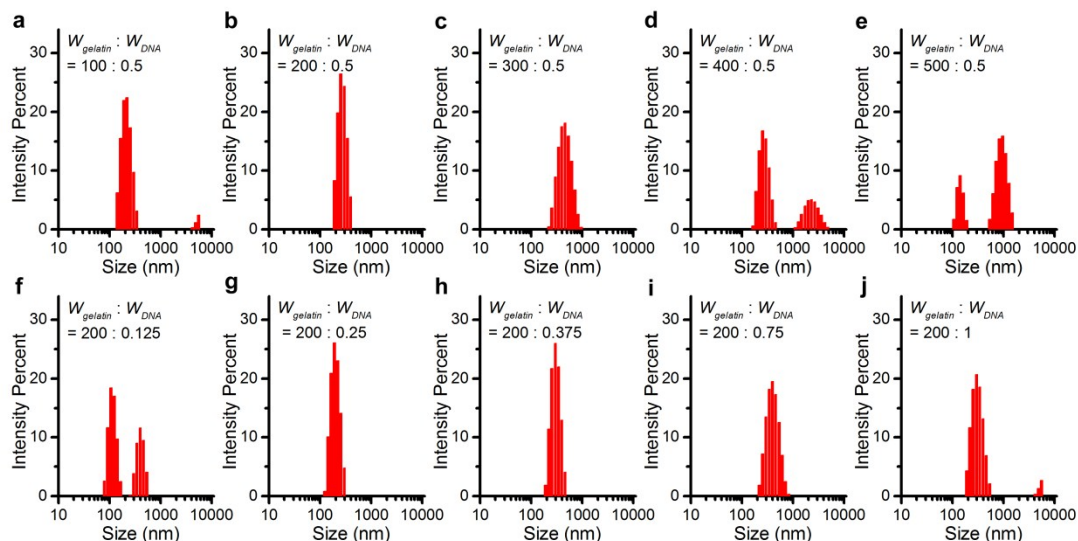

**Figure S4.** Preparation of DG NPs. (a)-(e) The size distribution of DG NPs prepared by different gelatin contents from 100 to 500 mg with the amount of DNA being fixed to 0.5 mg. (f)-(j) The size distribution of DG NPs prepared by different DNA contents from 0.125 to 500 mg with 200 mg of gelatin.

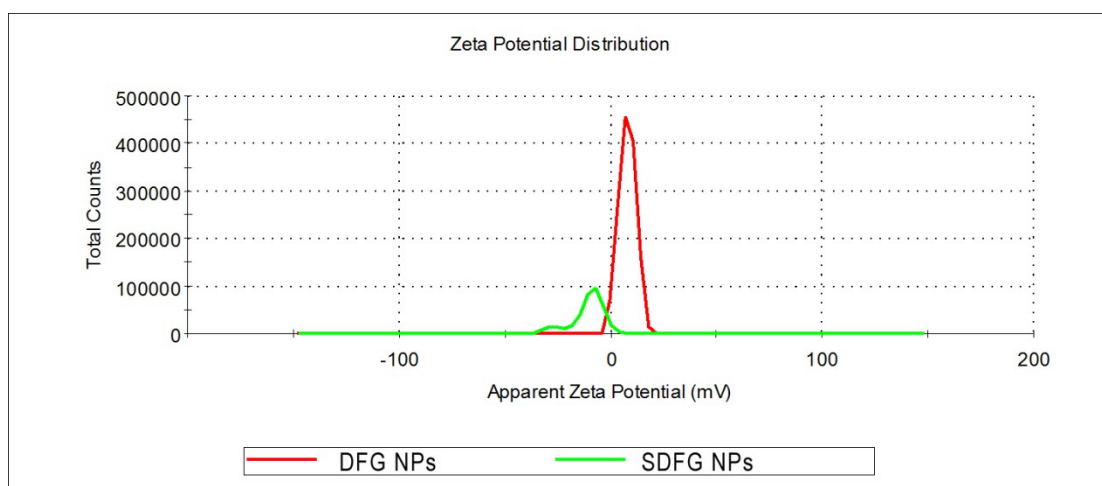

**Figure S5.** The zeta potential distribution of SDG NPs and SSDG NPs under neutral condition.

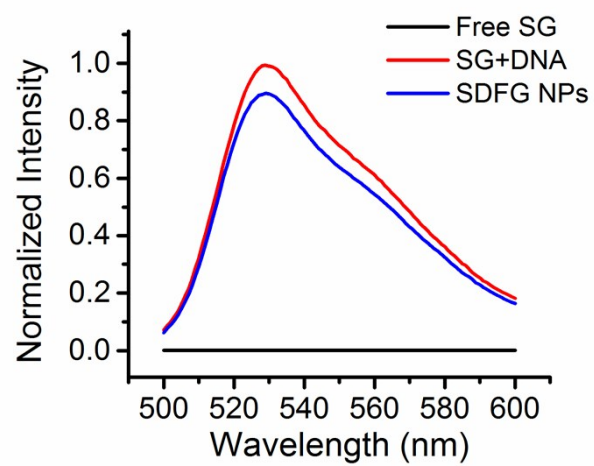

**Figure S6.** Fluorescence spectra of free SG, DNA complexed SG and SSDG NPs.

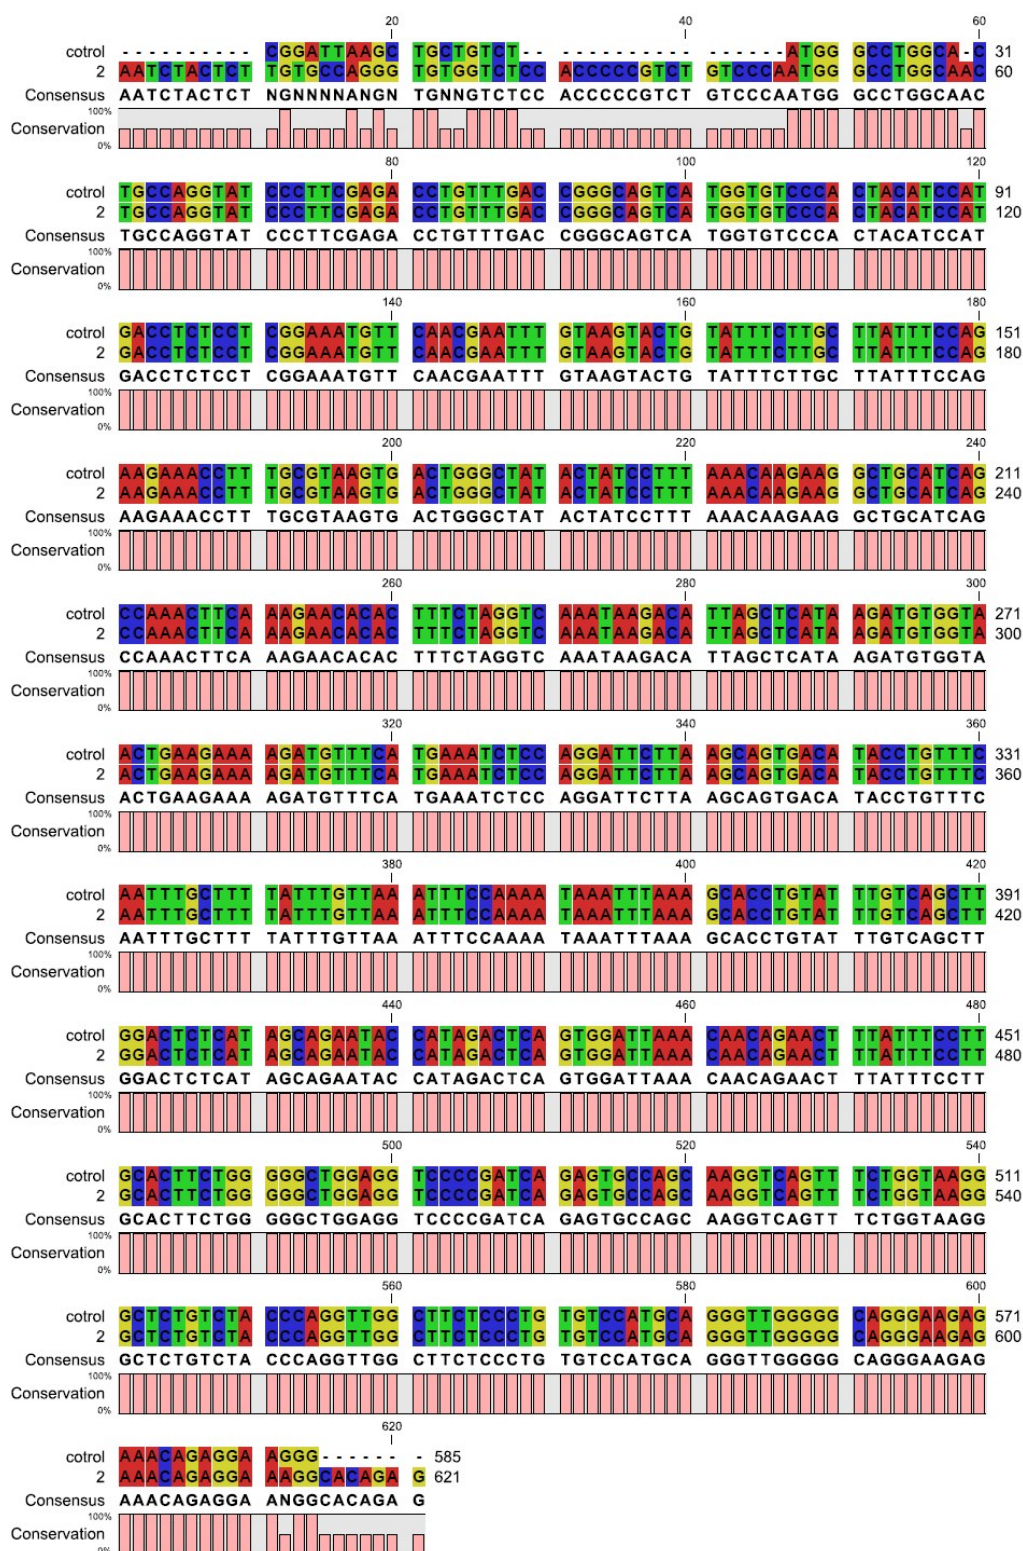

**Figure S7.** The DNA sequence alignment between the DNA in SSDG NPs after one year storage and the original sequence.
